# Supplementary material
Source: publisher figshare collection journal article supplement (https://acs.figshare.com/ndownloader/files/5827830)
Supplement: Supplementary file 1 [file 5827830]

(6) ESMS, NMR and HPLC data for PhTX-433 (2), continued.

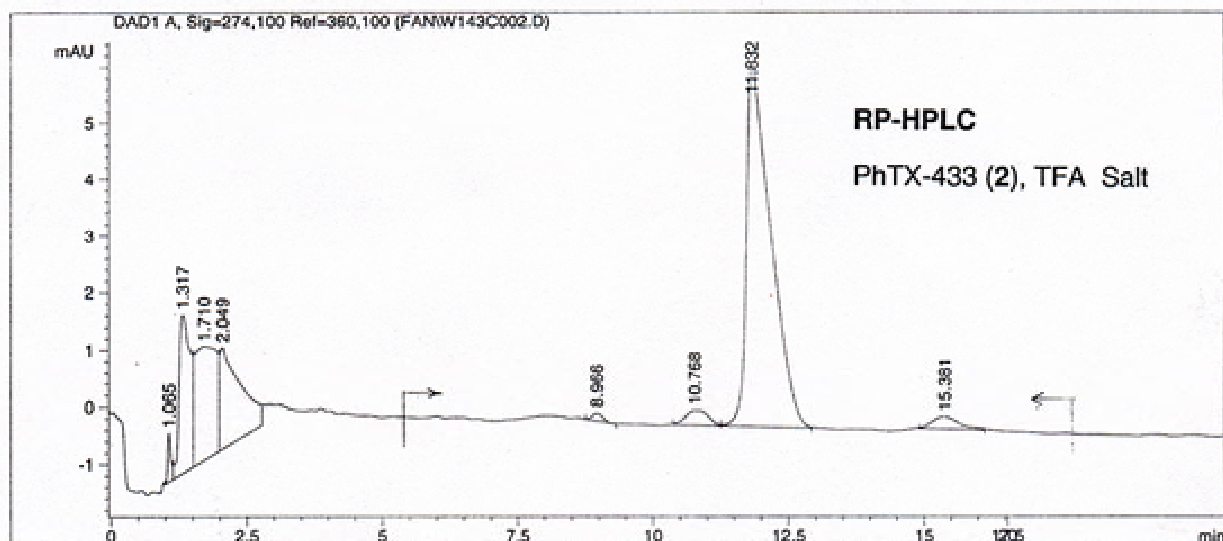

=====  
 Area Percent Report  
 =====

Sorted By : Signal  
 Multiplier : 1.0000  
 Dilution : 1.0000  
 Purity= 198.6078/215.5185X100%= 92%

Signal 1: DAD1 A, Sig=274,100 Ref=360,100

| Peak # | RetTime [min] | Type | Width [min] | Area [mAU*s] | Height [mAU] | Area %  |
|--------|---------------|------|-------------|--------------|--------------|---------|
| 1      | 1.065         | VV   | 0.0596      | 3.51574      | 8.61245e-1   | 0.9750  |
| 2      | 1.317         | VV   | 0.2086      | 40.08689     | 2.77405      | 11.1166 |
| 3      | 1.710         | VV   | 0.3448      | 54.66890     | 2.00064      | 15.1604 |
| 4      | 2.049         | VB   | 0.3260      | 46.81400     | 1.78497      | 12.9821 |
| 5      | 8.966         | PP   | 0.2000      | 1.79255      | 1.37546e-1   | 0.4971  |
| 6      | 10.768        | BV   | 0.3721      | 7.59059      | 2.55888e-1   | 2.1050  |
| 7      | 11.832        | VB   | 0.4229      | 198.60780    | 6.42105      | 55.0764 |
| 8      | 15.381        | BB   | 0.4317      | 7.52757      | 2.14335e-1   | 2.0875  |

Area= 215.5185

Totals : 360.60404 14.44973
